# Supplementary material
Source: PubMed Central journal article supplement (PMC8363034)

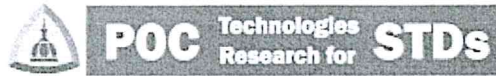

The Johns Hopkins University Center for Point-of-Care Tests for Sexually Transmitted Diseases (STD) thanks you for taking the time to answer our survey. The purpose of this study is to determine what qualities are most important when making point-of-care tests that are desirable for health care providers and laboratory personnel and others offering STD testing. Our hope is that the results of this study will be used to further develop that are effective and efficient and can positively influence public health.

Your completion of this survey will serve as your consent to be in this research study.

The survey should take less than 10 minutes to complete.

1. Sex:
  - Male
  - Female
  
2. What is your profession:
  - Nurse
  - Laboratorian / Medical Technician
  - Physician
  - Other, explain: \_\_\_\_\_
  
3. How long have you worked in your profession?
  - <1 year
  - 1 – 4 years
  - 5 – 9 years
  - 10 or more years
  
4. Have you used or ordered the following Point-of-Care test to test a patient in the past 12 months? (Check all that apply)
  - Malaria RDT
  - Pregnancy Test
  - Urine Dipstick
  - Rapid Test for Syphilis
  - Blood Glucose Test
  - HIV Rapid Test
  - Gram Stain
  - Cryptococcal Antigen Screening
  - Wet Mount Test
  - Vaginal pH
  - Affirm VP III
  - Other, explain: \_\_\_\_\_
  - None

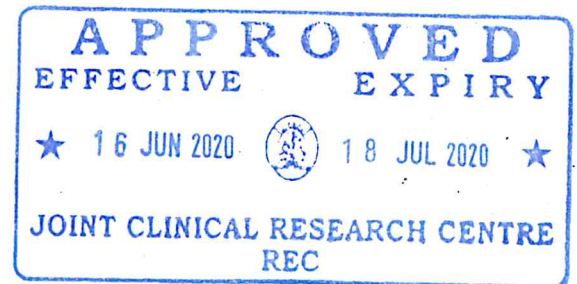

MobiNAAT (latterly PROMPT Dx) Point-of-Care (POC) Testing Medical Professional Survey in Uganda Clinics

- Unsure
5. How comfortable were you during the most recent time you were running or ordering a point-of-care test to test a patient?
- Not Very Comfortable
  - Not Comfortable
  - Neither Comfortable nor Uncomfortable
  - Comfortable
  - Very Comfortable
6. What characteristics of a diagnostic test are the most important in a gonorrhoea diagnostic situation? (may select more than one answer)
- Sensitivity
  - Turn-around time (Duration of test)
  - Ease of use
  - Cost
  - Other, explain: \_\_\_\_\_
7. Do you prefer point-of-care tests or standard laboratory tests?
- Point-of-care
  - Laboratory
  - No preference
8. If point-of-care tests are preferred, why? (may select more than one answer)
- Simplicity
  - Fast turn-around time
  - Mobility
  - Cost
  - Other, explain: \_\_\_\_\_
9. How long does a patient typically spend in your clinic?
- Between 30 minutes and 1 hour
  - About 1 to 2 hours
  - 2 to 4 hours
  - 5 or more hours
10. How long would you be willing to wait for a test to diagnose gonorrhoea at the point-of-care?
- Less than 5 minutes
  - Less than 15 minutes
  - Less than 30 minutes
  - Between 30 minutes and 1 hour
  - About 1 to 2 hours
  - 2 to 4 hours
  - 5 or more hours

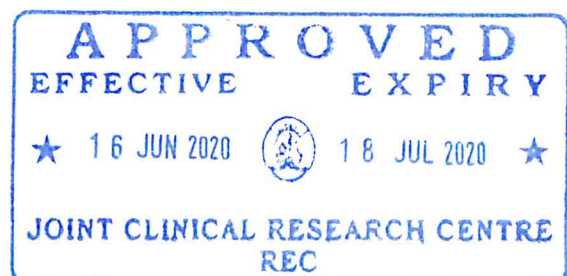

**After Watching Video**

1. After watching the video instruction, how easy would it be for you to follow the instructions?
  - Extremely easy to follow
  - Easy to follow
  - Somewhat easy to follow
  - Difficult to follow
  - Extremely difficult to follow
  - I do not run any laboratory test in my job
  
2. After watching the video instruction, how easy would it be for you to read and interpret (tell) the result?
  - Extremely easy to read & tell
  - Easy to read & tell
  - Somewhat easy to read & tell
  - Difficult to read & tell
  - Extremely difficult to read & tell
  - I do not run any laboratory test in my job
  
3. Overall, how easy would it be for you to perform the test?
  - Extremely easy to perform
  - Easy to perform
  - Somewhat easy to perform
  - Difficult to perform
  - Extremely difficult to perform
  - I do not run any laboratory test in my job
  
4. How much do you want to use this new point-of-care gonorrhoea test to test patients in your clinic in the near future?
  - Definitely would use it
  - Probably would use it
  - Maybe would use it
  - Probably not going to use it
  - Definitely not going to use it
  
5. Any other comments you wish to add

---

---

---

---

---

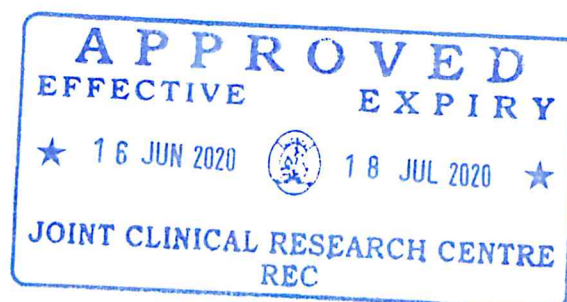

Supplement: NIHMS1730620-supplement-Data_File_S3__Survey_Questions.pdf [file NIHMS1730620-supplement-Data_File_S3__Survey_Questions.pdf]
